# Supplementary material for: Dissolution kinetics of a sodium borosilicate glass in Tris buffer solutions: impact of Tris concentration and acid (HCl/HNO3) identity
Source: Royal Society of Chemistry journal article supplement (doi:10.1039/d0cp06425d), 2021-01-01
Supplement: d0cp06425d1.pdf [file d0cp06425d1.pdf]

## Supplementary Information

Dissolution kinetics of a sodium borosilicate glass in Tris buffer  
solutions: Impact of Tris concentration and acid (HCl/HNO<sub>3</sub>) identity

Nicholas Stone-Weiss,<sup>1</sup> Nicholas J. Smith,<sup>2</sup> Randall E. Youngman,<sup>2</sup> Eric M.

Pierce,<sup>3</sup> Ashutosh Goel<sup>1,1</sup>

<sup>1</sup>Department of Materials Science and Engineering, Rutgers, The State University of New Jersey,  
Piscataway, NJ 08854, United States

<sup>2</sup>Science and Technology Division, Corning Incorporated, Corning, NY 14831, United States

<sup>3</sup>Environmental Sciences Division, Oak Ridge National Laboratory, Oak Ridge, TN 37831,  
United States

---

<sup>1</sup> Corresponding author:  
Email: [ag1179@soe.rutgers.edu](mailto:ag1179@soe.rutgers.edu); Ph: +1-848-333-1523

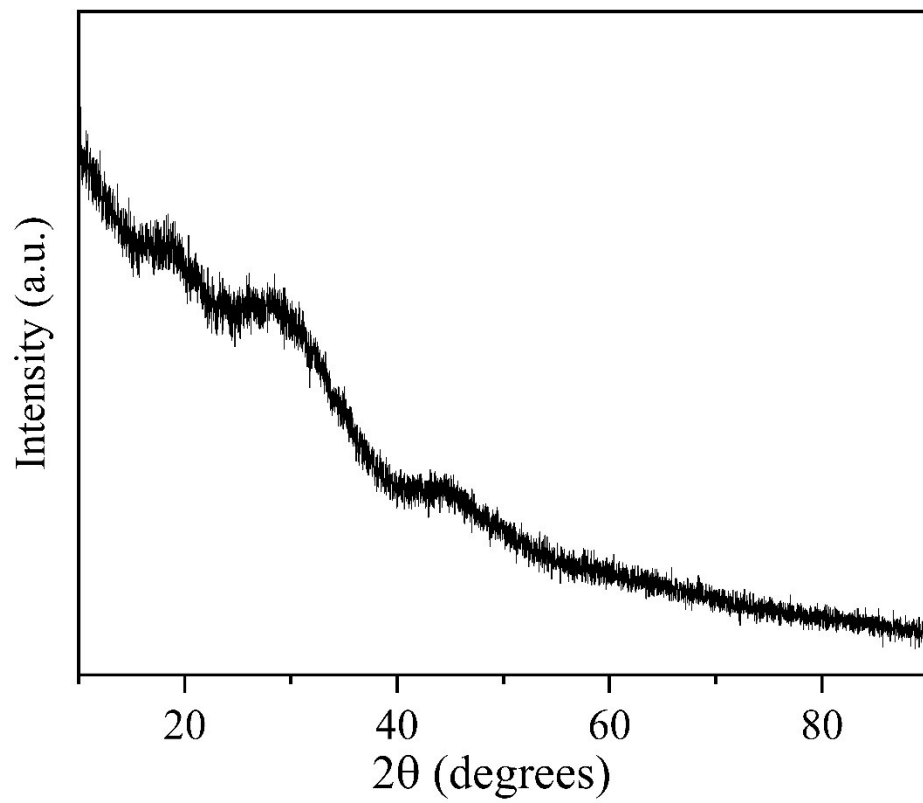

**Figure S1.** X-ray diffraction pattern verifying the amorphous nature of the as-synthesized glass composition.

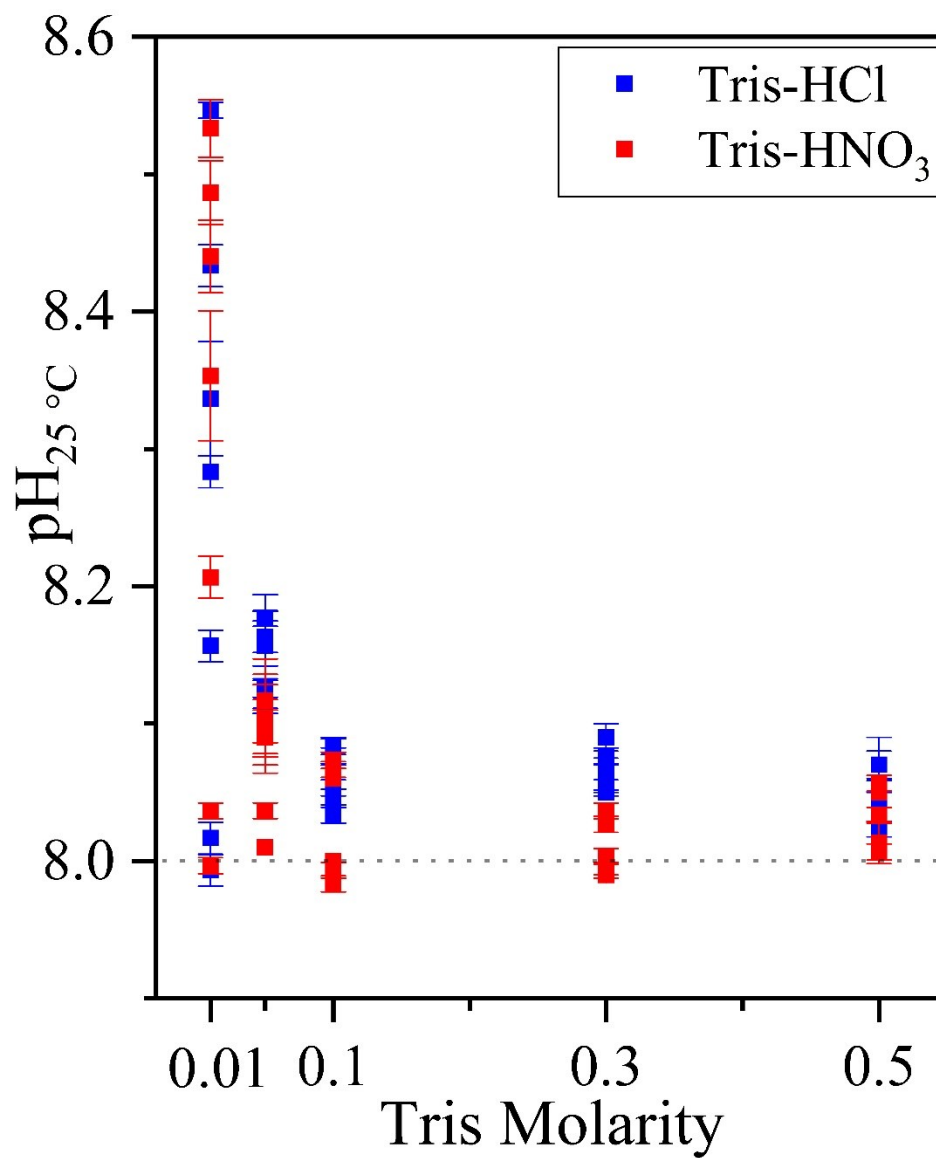

**Figure S2.** The distribution in experimental solution pH during pH = 8 dissolution experiments, as a function of the Tris molarity in the starting solution.

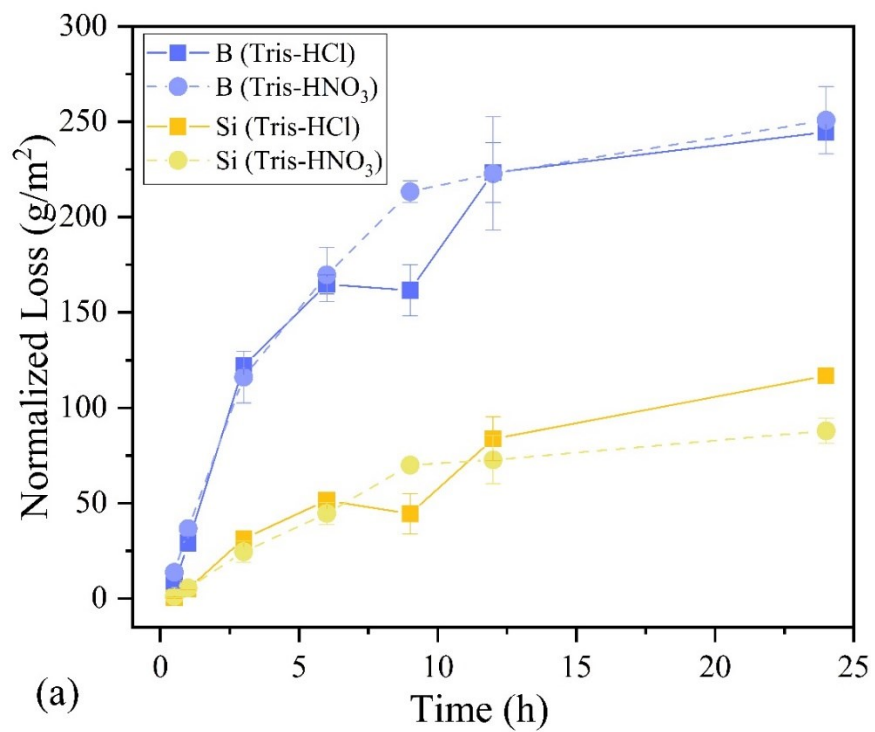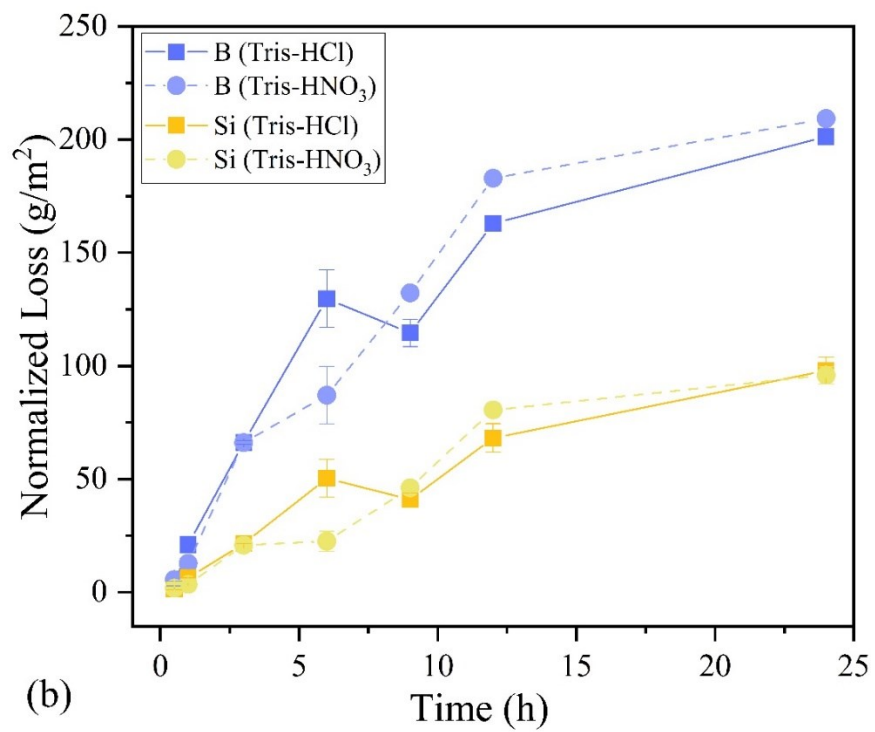

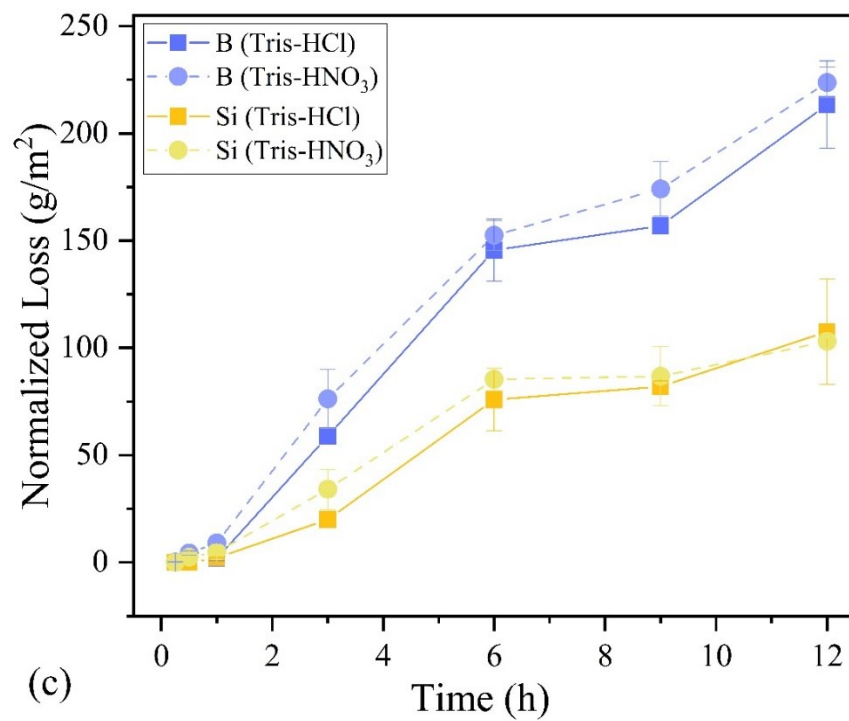

**Figure S3.** NL vs. time for 0.1 M Tris-based solutions at (a) pH = 7, (b) pH = 8, and (c) pH = 9. Direct comparisons between B and Si release from Tris-HCl and Tris-HNO<sub>3</sub> solutions are displayed.

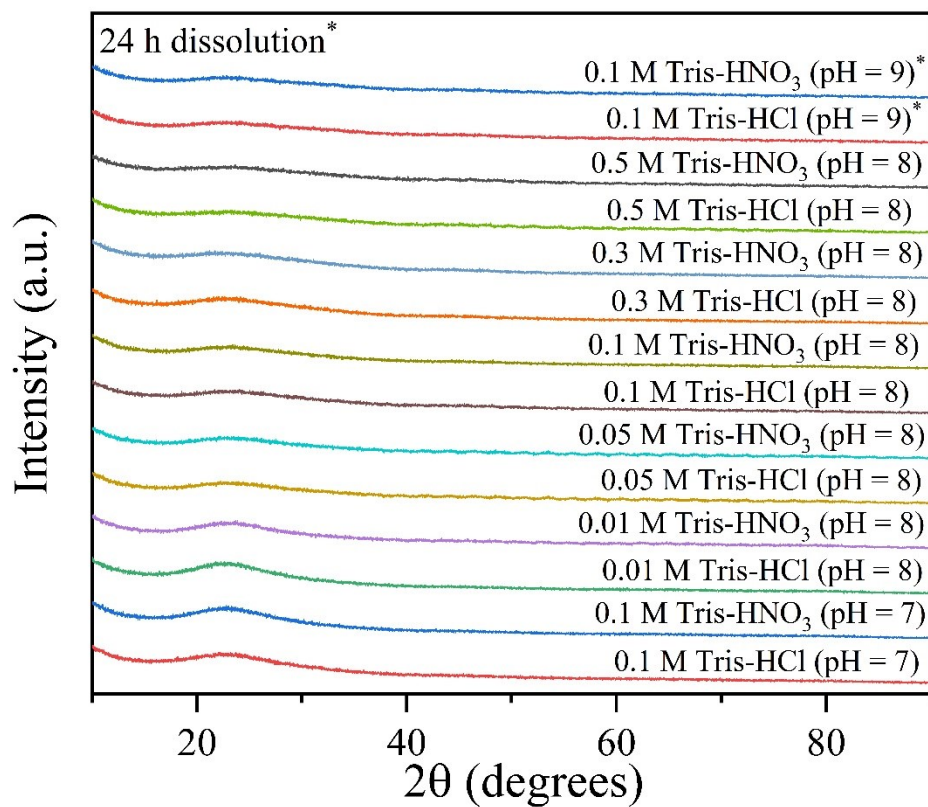

**Figure S4.** X-ray diffraction patterns of the powders recovered from 24 hours of dissolution experiments.  
 (\*) Denotes that the sample was recovered from 12 h experiments.

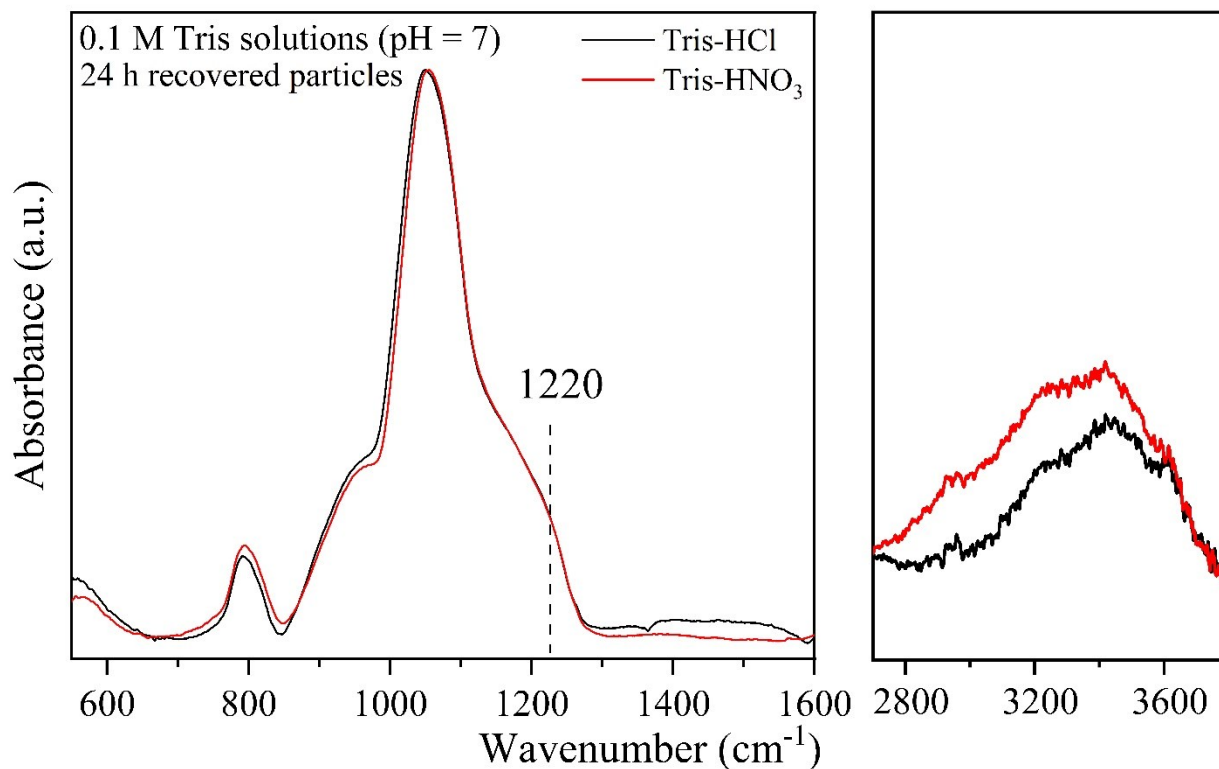

**Figure S5.** FTIR spectra of powders recovered from 24 h of pH = 7 environments. The band at 1220  $\text{cm}^{-1}$  indicates the development of a silica gel layer on the sample surface while the signatures in the region 3000-3700  $\text{cm}^{-1}$  are indicative of various O-H stretching vibrations of water and silanol species.

**Table S1.** Average concentration (ppm), averaged normalized loss ( $\text{g}/\text{m}^2$ ), and pH as a function of time (h) for all glasses in varied Tris-based solutions. The reported errors are calculated  $1\sigma$  standard deviation for duplicate samples.

| <b>0.1 M Tris-HCl (pH = 7)</b>              |           | <b>Concentration, ppm</b> |                 |          |                |           |                 | <b>Normalized Loss, g/m<sup>2</sup></b> |                 |          |                |           |                 |
|---------------------------------------------|-----------|---------------------------|-----------------|----------|----------------|-----------|-----------------|-----------------------------------------|-----------------|----------|----------------|-----------|-----------------|
| <b>Time (h)</b>                             | <b>pH</b> | <b>Na</b>                 | <b>Na-error</b> | <b>B</b> | <b>B-error</b> | <b>Si</b> | <b>Si-error</b> | <b>Na</b>                               | <b>Na-error</b> | <b>B</b> | <b>B-error</b> | <b>Si</b> | <b>Si-error</b> |
| 0.5                                         | 6.97±0.01 | 3.1                       | ±0.8            | 2.0      | ±0.4           | 0.3       | ±0.2            | 6.9                                     | ±1.9            | 7.0      | ±1.7           | 0.5       | ±0.4            |
| 1                                           | 7.02±0.01 | 14.2                      | ±1.6            | 6.8      | ±0.7           | 2.8       | ±0.3            | 31.1                                    | ±3.5            | 29.1     | ±3.3           | 5.0       | ±0.6            |
| 3                                           | 7.07±0.02 | 57.4                      | ±0.0            | 26.7     | ±0.3           | 17.5      | ±0.4            | 125.8                                   | ±0.0            | 121.9    | ±1.3           | 31.3      | ±0.7            |
| 6                                           | 7.08±0.03 | 80.5                      | ±2.2            | 35.9     | ±1.1           | 28.7      | ±0.5            | 176.3                                   | ±4.8            | 164.7    | ±5.1           | 51.5      | ±0.9            |
| 9                                           | 7.12±0.02 | 78.3                      | ±6.3            | 35.2     | ±2.9           | 24.8      | ±5.9            | 171.5                                   | ±13.7           | 161.7    | ±13.3          | 44.5      | ±10.5           |
| 12                                          | 7.15±0.01 | 106.6                     | ±8.1            | 48.5     | ±3.3           | 46.7      | ±6.4            | 233.4                                   | ±17.7           | 223.4    | ±15.6          | 83.8      | ±11.4           |
| 24                                          | 7.17±0.01 | 115.0                     | ±0.2            | 53.0     | ±0.2           | 65.2      | ±0.1            | 251.9                                   | ±0.4            | 244.6    | ±0.9           | 116.8     | ±0.2            |
| <b>0.1 M Tris-HNO<sub>3</sub> (pH = 7)</b>  |           | <b>Concentration, ppm</b> |                 |          |                |           |                 | <b>Normalized Loss, g/m<sup>2</sup></b> |                 |          |                |           |                 |
| <b>Time (h)</b>                             | <b>pH</b> | <b>Na</b>                 | <b>Na-error</b> | <b>B</b> | <b>B-error</b> | <b>Si</b> | <b>Si-error</b> | <b>Na</b>                               | <b>Na-error</b> | <b>B</b> | <b>B-error</b> | <b>Si</b> | <b>Si-error</b> |
| 0.5                                         | 7.03±0.01 | 4.4                       | ±0.8            | 3.0      | ±0.0           | 0.7       | ±0.3            | 9.7                                     | ±1.8            | 13.8     | ±0.0           | 1.2       | ±0.6            |
| 1                                           | 7.03±0.01 | 16.8                      | ±0.5            | 7.9      | ±0.1           | 3.1       | ±0.1            | 36.8                                    | ±1.0            | 36.6     | ±0.3           | 5.6       | ±0.1            |
| 3                                           | 7.06±0.01 | 52.3                      | ±5.8            | 24.9     | ±2.9           | 13.7      | ±3.1            | 114.6                                   | ±12.7           | 116.0    | ±13.5          | 24.5      | ±5.6            |
| 6                                           | 7.16±0.00 | 78.5                      | ±7.1            | 36.4     | ±3.1           | 24.9      | ±3.2            | 171.9                                   | ±15.5           | 169.8    | ±14.3          | 44.6      | ±5.8            |
| 9                                           | 7.16±0.02 | 97.2                      | ±2.1            | 45.8     | ±1.2           | 39.0      | ±0.3            | 212.9                                   | ±4.6            | 213.3    | ±5.7           | 70.0      | ±0.6            |
| 12                                          | 7.19±0.00 | 101.5                     | ±13.6           | 47.8     | ±6.4           | 40.5      | ±7.0            | 222.4                                   | ±29.9           | 222.8    | ±29.7          | 72.7      | ±12.6           |
| 24                                          | 7.16±0.00 | 113.3                     | ±8.1            | 53.8     | ±3.8           | 49.1      | ±3.7            | 248.1                                   | ±17.8           | 250.8    | ±17.7          | 88.0      | ±6.6            |
| <b>0.01 M Tris-HCl (pH = 8)</b>             |           | <b>Concentration, ppm</b> |                 |          |                |           |                 | <b>Normalized Loss, g/m<sup>2</sup></b> |                 |          |                |           |                 |
| <b>Time (h)</b>                             | <b>pH</b> | <b>Na</b>                 | <b>Na-error</b> | <b>B</b> | <b>B-error</b> | <b>Si</b> | <b>Si-error</b> | <b>Na</b>                               | <b>Na-error</b> | <b>B</b> | <b>B-error</b> | <b>Si</b> | <b>Si-error</b> |
| 0.5                                         | 7.99±0.01 | 2.3                       | ±0.4            | 3.1      | ±0.3           | <0.2      | --              | 5.0                                     | ±0.9            | 4.4      | ±1.2           | --        | --              |
| 1                                           | 8.02±0.01 | 9.5                       | ±1.8            | 6.0      | ±0.7           | 2.5       | ±0.8            | 20.8                                    | ±3.9            | 18.1     | ±3.1           | 4.4       | ±1.4            |
| 3                                           | 8.16±0.01 | 36.0                      | ±0.2            | 16.9     | ±0.2           | 17.3      | ±0.0            | 78.8                                    | ±0.5            | 69.0     | ±0.9           | 31.0      | ±0.0            |
| 6                                           | 8.28±0.01 | 57.4                      | ±0.5            | 26.5     | ±0.1           | 27.8      | ±1.4            | 125.8                                   | ±1.1            | 113.6    | ±0.5           | 49.9      | ±2.4            |
| 9                                           | 8.43±0.02 | 73.4                      | ±8.0            | 33.5     | ±3.7           | 40.6      | ±5.7            | 160.8                                   | ±17.5           | 146.4    | ±17.2          | 72.8      | ±10.3           |
| 12                                          | 8.34±0.04 | 64.2                      | ±2.1            | 29.9     | ±0.8           | 29.3      | ±2.1            | 140.5                                   | ±4.6            | 129.4    | ±3.8           | 52.6      | ±3.8            |
| 24                                          | 8.55±0.01 | 106.0                     | ±2.8            | 48.4     | ±1.2           | 62.4      | ±0.4            | 232.2                                   | ±6.2            | 215.5    | ±5.8           | 111.8     | ±0.7            |
| <b>0.01 M Tris-HNO<sub>3</sub> (pH = 8)</b> |           | <b>Concentration, ppm</b> |                 |          |                |           |                 | <b>Normalized Loss, g/m<sup>2</sup></b> |                 |          |                |           |                 |
| <b>Time (h)</b>                             | <b>pH</b> | <b>Na</b>                 | <b>Na-error</b> | <b>B</b> | <b>B-error</b> | <b>Si</b> | <b>Si-error</b> | <b>Na</b>                               | <b>Na-error</b> | <b>B</b> | <b>B-error</b> | <b>Si</b> | <b>Si-error</b> |
| 0.5                                         | 8.00±0.01 | 2.7                       | ±0.7            | 3.1      | ±0.3           | <0.2      | --              | 5.8                                     | ±1.5            | 5.4      | ±1.4           | --        | --              |
| 1                                           | 8.04±0.01 | 7.1                       | ±0.9            | 4.8      | ±0.4           | 1.4       | ±0.5            | 15.5                                    | ±2.0            | 13.8     | ±2.1           | 2.6       | ±0.9            |
| 3                                           | 8.21±0.02 | 29.1                      | ±2.7            | 13.9     | ±1.1           | 13.3      | ±1.6            | 63.7                                    | ±5.9            | 56.0     | ±5.3           | 23.8      | ±2.9            |
| 6                                           | 8.35±0.05 | 45.9                      | ±5.3            | 22.6     | ±4.3           | 17.1      | ±0.4            | 100.5                                   | ±11.7           | 96.7     | ±19.8          | 30.6      | ±0.7            |
| 9                                           | 8.44±0.03 | 75.4                      | ±2.0            | 33.7     | ±1.1           | 43.0      | ±3.1            | 165.0                                   | ±4.3            | 148.1    | ±5.1           | 77.1      | ±5.5            |
| 12                                          | 8.53±0.02 | 93.2                      | ±3.7            | 42.0     | ±1.5           | 56.4      | ±1.7            | 204.1                                   | ±8.0            | 186.8    | ±6.9           | 101.1     | ±3.1            |
| 24                                          | 8.49±0.02 | 114.0                     | ±0.3            | 51.4     | ±0.1           | 74.7      | ±2.5            | 249.6                                   | ±0.6            | 230.4    | ±0.7           | 133.9     | ±4.4            |



| <b>0.05 M Tris-HCl (pH = 8)</b>             |           | <b>Concentration, ppm</b> |                 |          |                |           |                 | <b>Normalized Loss, g/m<sup>2</sup></b> |                 |          |                |           |                 |
|---------------------------------------------|-----------|---------------------------|-----------------|----------|----------------|-----------|-----------------|-----------------------------------------|-----------------|----------|----------------|-----------|-----------------|
| <b>Time (h)</b>                             | <b>pH</b> | <b>Na</b>                 | <b>Na-error</b> | <b>B</b> | <b>B-error</b> | <b>Si</b> | <b>Si-error</b> | <b>Na</b>                               | <b>Na-error</b> | <b>B</b> | <b>B-error</b> | <b>Si</b> | <b>Si-error</b> |
| 0.5                                         | 8.13±0.02 | 4.1                       | ±1.0            | 4.0      | ±0.5           | 0.3       | ±0.4            | 9.0                                     | ±2.2            | 7.0      | ±2.2           | 0.5       | ±0.7            |
| 1                                           | 8.09±0.00 | 9.6                       | ±0.0            | 6.2      | ±0.1           | 2.2       | ±0.4            | 21.0                                    | ±0.1            | 17.4     | ±0.7           | 4.0       | ±0.8            |
| 3                                           | 8.11±0.01 | 36.0                      | ±0.6            | 17.4     | ±0.2           | 12.4      | ±0.8            | 78.9                                    | ±1.3            | 69.5     | ±1.0           | 22.3      | ±1.4            |
| 6                                           | 8.16±0.03 | 54.0                      | ±11.7           | 25.4     | ±4.7           | 21.3      | ±8.4            | 118.2                                   | ±25.7           | 106.7    | ±21.7          | 38.2      | ±15.0           |
| 9                                           | 8.18±0.01 | 80.4                      | ±2.0            | 37.1     | ±2.2           | 40.7      | ±3.6            | 176.2                                   | ±4.4            | 161.0    | ±10.1          | 72.9      | ±6.5            |
| 12                                          | 8.16±0.01 | 76.5                      | ±15.2           | 35.3     | ±7.1           | 35.5      | ±20.1           | 167.5                                   | ±33.4           | 153.1    | ±33.0          | 63.6      | ±36.1           |
| 24                                          | 8.16±0.03 | 102.5                     | ±3.2            | 47.1     | ±1.1           | 57.0      | ±2.5            | 224.5                                   | ±6.9            | 207.8    | ±4.9           | 102.1     | ±4.5            |
| <b>0.05 M Tris-HNO<sub>3</sub> (pH = 8)</b> |           | <b>Concentration, ppm</b> |                 |          |                |           |                 | <b>Normalized Loss, g/m<sup>2</sup></b> |                 |          |                |           |                 |
| <b>Time (h)</b>                             | <b>pH</b> | <b>Na</b>                 | <b>Na-error</b> | <b>B</b> | <b>B-error</b> | <b>Si</b> | <b>Si-error</b> | <b>Na</b>                               | <b>Na-error</b> | <b>B</b> | <b>B-error</b> | <b>Si</b> | <b>Si-error</b> |
| 0.5                                         | 8.12±0.03 | 9.8                       | ±0.3            | 5.9      | ±0.1           | 0.9       | ±0.0            | 21.5                                    | ±0.6            | 18.7     | ±0.5           | 1.7       | ±0.0            |
| 1                                           | 8.01±0.00 | 17.3                      | ±0.6            | 9.4      | ±1.0           | 3.4       | ±0.0            | 37.8                                    | ±1.3            | 35.1     | ±4.5           | 6.1       | ±0.1            |
| 3                                           | 8.10±0.04 | 37.9                      | ±1.3            | 17.9     | ±0.6           | 10.8      | ±1.0            | 83.1                                    | ±2.9            | 74.4     | ±2.8           | 19.4      | ±1.8            |
| 6                                           | 8.09±0.02 | 58.6                      | ±0.8            | 26.8     | ±0.9           | 19.8      | ±1.2            | 128.3                                   | ±1.8            | 115.8    | ±4.1           | 35.5      | ±2.1            |
| 9                                           | 8.10±0.02 | 68.0                      | ±0.5            | 30.5     | ±0.4           | 24.0      | ±0.8            | 149.0                                   | ±1.0            | 133.2    | ±1.7           | 43.1      | ±1.4            |
| 12                                          | 8.04±0.01 | 73.4                      | ±0.7            | 32.9     | ±0.3           | 24.3      | ±0.4            | 160.8                                   | ±1.4            | 144.3    | ±1.5           | 43.5      | ±0.7            |
| 24                                          | 8.10±0.03 | 93.1                      | ±2.4            | 42.1     | ±1.2           | 42.3      | ±5.5            | 204.0                                   | ±5.3            | 187.4    | ±5.5           | 75.8      | ±9.9            |
| <b>0.1 M Tris-HCl (pH = 8)</b>              |           | <b>Concentration, ppm</b> |                 |          |                |           |                 | <b>Normalized Loss, g/m<sup>2</sup></b> |                 |          |                |           |                 |
| <b>Time (h)</b>                             | <b>pH</b> | <b>Na</b>                 | <b>Na-error</b> | <b>B</b> | <b>B-error</b> | <b>Si</b> | <b>Si-error</b> | <b>Na</b>                               | <b>Na-error</b> | <b>B</b> | <b>B-error</b> | <b>Si</b> | <b>Si-error</b> |
| 0.5                                         | 8.08±0.01 | <0.5                      | --              | 0.6      | ±0.0           | 1.4       | ±0.0            | --                                      | --              | 2.8      | ±0.0           | 1.3       | ±0.1            |
| 1                                           | 8.05±0.01 | 8.8                       | ±0.5            | 4.5      | ±0.1           | 4.3       | ±0.1            | 19.2                                    | ±1.0            | 21.1     | ±0.5           | 6.4       | ±0.2            |
| 3                                           | 8.08±0.01 | 30.0                      | ±0.4            | 14.2     | ±0.2           | 12.7      | ±0.0            | 65.7                                    | ±0.8            | 66.2     | ±0.9           | 21.5      | ±0.0            |
| 6                                           | 8.03±0.01 | 57.0                      | ±2.9            | 27.8     | ±2.7           | 28.8      | ±4.7            | 124.8                                   | ±6.5            | 129.7    | ±12.7          | 50.4      | ±8.4            |
| 9                                           | 8.05±0.01 | 52.4                      | ±3.4            | 24.6     | ±1.3           | 23.6      | ±1.5            | 114.8                                   | ±7.3            | 114.6    | ±6.1           | 41.0      | ±2.7            |
| 12                                          | 8.08±0.01 | 73.5                      | ±0.1            | 35.0     | ±0.1           | 38.7      | ±3.6            | 160.9                                   | ±0.3            | 163.0    | ±0.3           | 68.1      | ±6.4            |
| 24                                          | 8.04±0.00 | 90.9                      | ±1.8            | 43.2     | ±0.5           | 55.4      | ±3.2            | 199.1                                   | ±3.9            | 201.3    | ±2.2           | 98.0      | ±5.8            |
| <b>0.1 M Tris-HNO<sub>3</sub> (pH = 8)</b>  |           | <b>Concentration, ppm</b> |                 |          |                |           |                 | <b>Normalized Loss, g/m<sup>2</sup></b> |                 |          |                |           |                 |
| <b>Time (h)</b>                             | <b>pH</b> | <b>Na</b>                 | <b>Na-error</b> | <b>B</b> | <b>B-error</b> | <b>Si</b> | <b>Si-error</b> | <b>Na</b>                               | <b>Na-error</b> | <b>B</b> | <b>B-error</b> | <b>Si</b> | <b>Si-error</b> |
| 0.5                                         | 8.07±0.01 | 1.5                       | ±0.6            | 1.2      | ±0.2           | 1.7       | ±0.2            | 3.3                                     | ±1.3            | 5.6      | ±0.8           | 1.8       | ±0.3            |
| 1                                           | 8.06±0.00 | 4.3                       | ±1.1            | 2.7      | ±0.5           | 2.7       | ±0.5            | 9.5                                     | ±2.3            | 12.8     | ±2.1           | 3.5       | ±0.8            |
| 3                                           | 8.07±0.01 | 29.3                      | ±1.2            | 14.2     | ±0.4           | 12.4      | ±0.9            | 64.3                                    | ±2.5            | 66.1     | ±2.1           | 20.9      | ±1.5            |
| 6                                           | 8.07±0.01 | 37.7                      | ±4.1            | 18.7     | ±2.7           | 13.3      | ±2.5            | 82.6                                    | ±8.9            | 87.1     | ±12.8          | 22.5      | ±4.4            |
| 9                                           | 7.98±0.01 | 60.2                      | ±1.0            | 28.4     | ±0.4           | 26.5      | ±0.7            | 131.8                                   | ±2.2            | 132.3    | ±1.7           | 46.1      | ±1.3            |
| 12                                          | 8.00±0.00 | 81.7                      | ±0.7            | 39.3     | ±0.4           | 45.7      | ±0.2            | 178.8                                   | ±1.5            | 182.9    | ±1.9           | 80.6      | ±0.3            |
| 24                                          | 7.99±0.01 | 93.8                      | ±0.1            | 44.9     | ±0.0           | 54.2      | ±2.2            | 205.4                                   | ±0.1            | 209.3    | ±0.1           | 95.9      | ±3.9            |

| <b>0.3 M Tris-HCl (pH = 8)</b>             |           | <b>Concentration, ppm</b> |                 |          |                |           |                 | <b>Normalized Loss, g/m<sup>2</sup></b> |                 |          |                |           |                 |
|--------------------------------------------|-----------|---------------------------|-----------------|----------|----------------|-----------|-----------------|-----------------------------------------|-----------------|----------|----------------|-----------|-----------------|
| <b>Time (h)</b>                            | <b>pH</b> | <b>Na</b>                 | <b>Na-error</b> | <b>B</b> | <b>B-error</b> | <b>Si</b> | <b>Si-error</b> | <b>Na</b>                               | <b>Na-error</b> | <b>B</b> | <b>B-error</b> | <b>Si</b> | <b>Si-error</b> |
| 0.5                                        | 8.09±0.01 | 6.8                       | ±0.0            | 4.8      | ±0.0           | 0.9       | ±0.3            | 14.8                                    | ±0.1            | 13.6     | ±0.1           | 1.6       | ±0.5            |
| 1                                          | 8.08±0.01 | 11.2                      | ±0.5            | 6.5      | ±0.2           | 3.5       | ±0.2            | 24.3                                    | ±1.2            | 21.1     | ±0.9           | 6.2       | ±0.3            |
| 3                                          | 8.05±0.00 | 26.9                      | ±1.1            | 14.6     | ±0.5           | 10.6      | ±0.7            | 58.7                                    | ±2.3            | 59.2     | ±2.5           | 19.1      | ±1.2            |
| 6                                          | 8.06±0.01 | 42.2                      | ±3.3            | 22.7     | ±1.4           | 20.9      | ±1.8            | 92.4                                    | ±7.3            | 96.9     | ±6.6           | 37.4      | ±3.1            |
| 9                                          | 8.06±0.01 | 48.2                      | ±1.0            | 25.4     | ±0.5           | 23.6      | ±2.0            | 105.5                                   | ±2.1            | 109.6    | ±2.5           | 42.3      | ±3.5            |
| 12                                         | 8.05±0.01 | 54.3                      | ±0.9            | 28.5     | ±0.7           | 28.1      | ±3.3            | 118.8                                   | ±1.9            | 123.8    | ±3.1           | 50.3      | ±5.9            |
| 24                                         | 8.06±0.01 | 69.3                      | ±1.6            | 36.4     | ±1.5           | 44.0      | ±4.5            | 151.6                                   | ±3.4            | 160.4    | ±7.2           | 78.9      | ±8.1            |
| <b>0.3 M Tris-HNO<sub>3</sub> (pH = 8)</b> |           | <b>Concentration, ppm</b> |                 |          |                |           |                 | <b>Normalized Loss, g/m<sup>2</sup></b> |                 |          |                |           |                 |
| <b>Time (h)</b>                            | <b>pH</b> | <b>Na</b>                 | <b>Na-error</b> | <b>B</b> | <b>B-error</b> | <b>Si</b> | <b>Si-error</b> | <b>Na</b>                               | <b>Na-error</b> | <b>B</b> | <b>B-error</b> | <b>Si</b> | <b>Si-error</b> |
| 0.5                                        | 8.04±0.01 | 6.2                       | ±1.1            | 3.5      | ±0.5           | 0.9       | ±0.4            | 13.7                                    | ±2.3            | 15.4     | ±2.2           | 1.6       | ±0.7            |
| 1                                          | 8.03±0.01 | 9.6                       | ±0.9            | 5.2      | ±0.4           | 2.5       | ±0.4            | 21.0                                    | ±1.9            | 23.3     | ±2.0           | 4.5       | ±0.7            |
| 3                                          | 7.99±0.01 | 27.0                      | ±0.2            | 14.0     | ±0.1           | 10.5      | ±0.2            | 59.2                                    | ±0.4            | 64.3     | ±0.4           | 18.8      | ±0.4            |
| 6                                          | 8.00±0.01 | 40.9                      | ±3.9            | 21.2     | ±1.8           | 17.5      | ±2.9            | 89.5                                    | ±8.5            | 98.1     | ±8.2           | 31.3      | ±5.1            |
| 9                                          | 8.00±0.00 | 48.5                      | ±3.1            | 24.9     | ±1.9           | 21.2      | ±4.3            | 106.2                                   | ±6.9            | 115.1    | ±9.0           | 38.1      | ±7.7            |
| 12                                         | 8.00±0.00 | 53.9                      | ±5.0            | 27.8     | ±2.7           | 26.1      | ±3.9            | 118.1                                   | ±11.0           | 128.7    | ±12.5          | 46.8      | ±6.9            |
| 24                                         | 7.99±0.00 | 68.6                      | ±0.2            | 35.4     | ±0.1           | 39.5      | ±0.6            | 150.3                                   | ±0.4            | 164.2    | ±0.3           | 70.8      | ±1.1            |
| <b>0.5 M Tris-HCl (pH = 8)</b>             |           | <b>Concentration, ppm</b> |                 |          |                |           |                 | <b>Normalized Loss, g/m<sup>2</sup></b> |                 |          |                |           |                 |
| <b>Time (h)</b>                            | <b>pH</b> | <b>Na</b>                 | <b>Na-error</b> | <b>B</b> | <b>B-error</b> | <b>Si</b> | <b>Si-error</b> | <b>Na</b>                               | <b>Na-error</b> | <b>B</b> | <b>B-error</b> | <b>Si</b> | <b>Si-error</b> |
| 0.5                                        | 8.07±0.02 | 5.3                       | ±0.7            | 2.8      | ±0.4           | 0.8       | ±0.5            | 11.3                                    | ±1.5            | 12.8     | ±1.8           | 1.4       | ±0.9            |
| 1                                          | 8.07±0.01 | 6.9                       | ±0.5            | 3.6      | ±0.2           | 1.4       | ±0.3            | 14.7                                    | ±1.0            | 16.7     | ±1.0           | 2.5       | ±0.5            |
| 3                                          | 8.02±0.00 | 21.2                      | ±0.4            | 11.2     | ±0.2           | 8.4       | ±0.5            | 46.1                                    | ±0.9            | 52.1     | ±1.0           | 15.0      | ±0.9            |
| 6                                          | 8.03±0.00 | 35.2                      | ±0.2            | 18.2     | ±0.1           | 16.9      | ±0.5            | 76.6                                    | ±0.3            | 84.7     | ±0.3           | 30.4      | ±0.9            |
| 9                                          | 8.04±0.02 | 39.1                      | ±0.0            | 20.6     | ±0.1           | 18.5      | ±0.7            | 85.1                                    | ±0.1            | 95.7     | ±0.6           | 33.2      | ±1.3            |
| 12                                         | 8.03±0.01 | 42.0                      | ±0.8            | 21.9     | ±0.6           | 20.0      | ±2.5            | 91.6                                    | ±1.7            | 102.1    | ±2.9           | 35.9      | ±4.4            |
| 24                                         | 8.02±0.01 | 56.5                      | ±0.7            | 29.6     | ±0.4           | 30.4      | ±1.5            | 123.3                                   | ±1.5            | 137.8    | ±1.7           | 54.5      | ±2.7            |
| <b>0.5 M Tris-HNO<sub>3</sub> (pH = 8)</b> |           | <b>Concentration, ppm</b> |                 |          |                |           |                 | <b>Normalized Loss, g/m<sup>2</sup></b> |                 |          |                |           |                 |
| <b>Time (h)</b>                            | <b>pH</b> | <b>Na</b>                 | <b>Na-error</b> | <b>B</b> | <b>B-error</b> | <b>Si</b> | <b>Si-error</b> | <b>Na</b>                               | <b>Na-error</b> | <b>B</b> | <b>B-error</b> | <b>Si</b> | <b>Si-error</b> |
| 0.5                                        | 8.06±0.01 | 4.3                       | ±0.0            | 2.1      | ±0.0           | <0.2      | --              | 9.4                                     | ±0.0            | 9.8      | ±0.0           | --        | --              |
| 1                                          | 8.05±0.00 | 8.4                       | ±0.1            | 4.4      | ±0.1           | 2.1       | ±0.0            | 18.5                                    | ±0.3            | 20.3     | ±0.4           | 3.8       | ±0.0            |
| 3                                          | 8.01±0.01 | 21.2                      | ±0.5            | 11.1     | ±0.2           | 7.7       | ±0.6            | 46.5                                    | ±1.0            | 51.9     | ±0.9           | 13.8      | ±1.1            |
| 6                                          | 8.01±0.01 | 36.4                      | ±2.0            | 19.0     | ±1.0           | 17.4      | ±1.7            | 79.7                                    | ±4.3            | 88.6     | ±4.5           | 31.1      | ±3.1            |
| 9                                          | 8.03±0.01 | 38.3                      | ±0.2            | 20.5     | ±0.0           | 16.8      | ±0.9            | 83.9                                    | ±0.4            | 95.3     | ±0.0           | 30.1      | ±1.5            |
| 12                                         | 8.01±0.01 | 39.0                      | ±0.3            | 20.6     | ±0.1           | 16.0      | ±0.4            | 85.3                                    | ±0.7            | 95.8     | ±0.4           | 28.7      | ±0.7            |
| 24                                         | 8.01±0.02 | 56.9                      | ±3.1            | 30.0     | ±1.7           | 32.5      | ±4.2            | 124.7                                   | ±6.8            | 139.8    | ±8.0           | 58.3      | ±7.5            |

| <b>0.1 M Tris-HCl (pH = 9)</b>             |           | <b>Concentration, ppm</b> |                 |          |                |           |                 | <b>Normalized Loss, g/m<sup>2</sup></b> |                 |          |                |           |                 |
|--------------------------------------------|-----------|---------------------------|-----------------|----------|----------------|-----------|-----------------|-----------------------------------------|-----------------|----------|----------------|-----------|-----------------|
| <b>Time (h)</b>                            | <b>pH</b> | <b>Na</b>                 | <b>Na-error</b> | <b>B</b> | <b>B-error</b> | <b>Si</b> | <b>Si-error</b> | <b>Na</b>                               | <b>Na-error</b> | <b>B</b> | <b>B-error</b> | <b>Si</b> | <b>Si-error</b> |
| 0.25                                       | 8.99±0.01 | <0.5                      | --              | <0.2     | --             | <0.2      | --              | --                                      | --              | --       | --             | --        | --              |
| 0.5                                        | 8.99±0.01 | <0.5                      | --              | <0.2     | --             | <0.2      | --              | --                                      | --              | --       | --             | --        | --              |
| 1                                          | 9.02±0.02 | 2.3                       | ±0.4            | 0.4      | ±0.2           | 1.2       | ±0.2            | 5.1                                     | ±1.0            | 1.8      | ±1.0           | 2.1       | ±0.4            |
| 3                                          | 9.02±0.03 | 25.9                      | ±0.7            | 12.7     | ±0.4           | 11.2      | ±0.3            | 56.6                                    | ±1.5            | 58.9     | ±1.7           | 20.1      | ±0.5            |
| 6                                          | 9.05±0.03 | 63.1                      | ±6.2            | 31.3     | ±3.1           | 42.3      | ±8.1            | 138.3                                   | ±13.7           | 145.6    | ±14.4          | 75.9      | ±14.4           |
| 9                                          | 9.03±0.01 | 68.0                      | ±0.5            | 33.7     | ±0.3           | 45.8      | ±1.4            | 149.0                                   | ±1.2            | 156.9    | ±1.4           | 82.0      | ±2.6            |
| 12                                         | 9.04±0.00 | 91.0                      | ±7.4            | 45.8     | ±4.3           | 60.0      | ±13.7           | 199.3                                   | ±16.1           | 213.4    | ±20.2          | 107.5     | ±24.6           |
| <b>0.1 M Tris-HNO<sub>3</sub> (pH = 9)</b> |           | <b>Concentration, ppm</b> |                 |          |                |           |                 | <b>Normalized Loss, g/m<sup>2</sup></b> |                 |          |                |           |                 |
| <b>Time (h)</b>                            | <b>pH</b> | <b>Na</b>                 | <b>Na-error</b> | <b>B</b> | <b>B-error</b> | <b>Si</b> | <b>Si-error</b> | <b>Na</b>                               | <b>Na-error</b> | <b>B</b> | <b>B-error</b> | <b>Si</b> | <b>Si-error</b> |
| 0.25                                       | 8.95±0.01 | 0.7                       | ±0.3            | <0.2     | --             | <0.2      | --              | 1.6                                     | ±0.7            | --       | --             | --        | --              |
| 0.5                                        | 8.95±0.01 | 3.8                       | ±0.3            | 0.9      | ±0.2           | 1.4       | ±0.1            | 8.3                                     | ±0.6            | 4.4      | ±1.1           | 2.5       | ±0.3            |
| 1                                          | 8.93±0.01 | 5.5                       | ±0.0            | 2.0      | ±0.0           | 2.7       | ±0.1            | 12.2                                    | ±0.1            | 9.2      | ±0.1           | 4.8       | ±0.1            |
| 3                                          | 8.98±0.01 | 34.3                      | ±4.9            | 16.4     | ±3.0           | 19.0      | ±5.2            | 75.0                                    | ±10.8           | 76.3     | ±13.9          | 34.1      | ±9.3            |
| 6                                          | 8.98±0.00 | 66.5                      | ±2.7            | 32.7     | ±1.5           | 47.6      | ±2.8            | 145.5                                   | ±5.9            | 152.5    | ±6.9           | 85.4      | ±5.1            |
| 9                                          | 9.00±0.01 | 75.3                      | ±4.0            | 37.4     | ±2.7           | 48.4      | ±7.6            | 165.0                                   | ±8.7            | 174.1    | ±12.8          | 86.8      | ±13.7           |
| 12                                         | 9.01±0.01 | 95.1                      | ±3.2            | 48.0     | ±1.5           | 57.5      | ±1.7            | 208.2                                   | ±6.9            | 223.7    | ±7.2           | 103.2     | ±3.1            |
